# Supplementary material for: Quantitative Microstructural Analysis of Cellular and Tissue Remodeling in Human Glaucoma Optic Nerve Head
Source: PubMed Central journal article supplement — Invest Ophthalmol Vis Sci. 2022 Oct 21;63(11):18. doi: 10.1167/iovs.63.11.18 (PMC9617510; doi:10.1167/iovs.63.11.18), 2022-10-21
Supplement: iovs-63-11-18_s001.pdf [file iovs-63-11-18_s001.pdf]

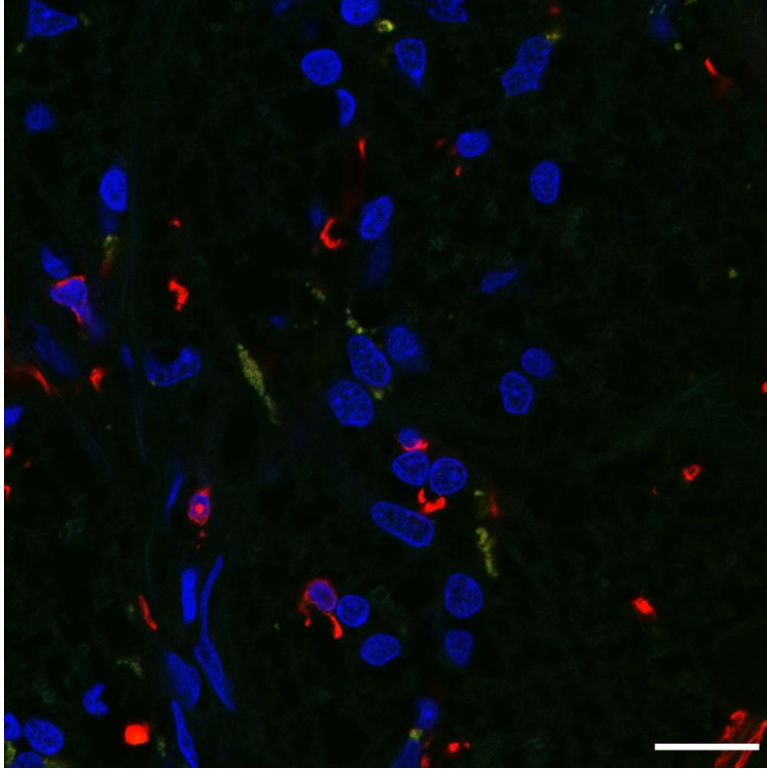

**Supplemental Figure SF1.** Control LC labeled with anti-TMEM119 (green) a marker thought to be more specific for microglial processes, and IBA1, which labels both microglial and macrophage processes (red). In this control specimen, both microglial processes and presumed microglia and macrophage processes are sparsely present and few label with both antibodies. DAPI = blue. Bar = 20  $\mu$ m.
