# Supplementary material for: Quantitative Microstructural Analysis of Cellular and Tissue Remodeling in Human Glaucoma Optic Nerve Head
Source: PubMed Central journal article supplement — Invest Ophthalmol Vis Sci. 2022 Oct 21;63(11):18. doi: 10.1167/iovs.63.11.18 (PMC9617510; doi:10.1167/iovs.63.11.18), 2022-10-21
Supplement: iovs-63-11-18_s002.pdf [file iovs-63-11-18_s002.pdf]

**Supplemental Table ST2:** Comparison of structural parameters between control and glaucoma lamina cribrosa.

| Tissue Component     | Structural Parameter                                  | Control (n=9)      | Glaucoma (n=16)     | p value      |
|----------------------|-------------------------------------------------------|--------------------|---------------------|--------------|
| GFAP in pores        | <b>Area fraction (GFAP area/mask area)</b>            | <b>0.51 ± 0.04</b> | <b>0.48 ± 0.03</b>  | <b>0.010</b> |
|                      | Average process width (um)                            | 1.60 ± 0.10        | 1.63 ± 0.09         | 0.42         |
| GFAP overall         | Area fraction (GFAP area/mask area)                   | 0.42 ± 0.04        | 0.41 ± 0.03         | 0.55         |
|                      | Average process width (um)                            | 1.72 ± 0.11        | 1.71 ± 0.10         | 0.91         |
|                      |                                                       |                    |                     |              |
| Actin in pores       | <b>Area fraction (actin area/mask area)</b>           | <b>0.48 ± 0.03</b> | <b>0.44 ± 0.04</b>  | <b>0.074</b> |
|                      | Average process width (um)                            | 1.05 ± 0.03        | 1.07 ± 0.08         | 0.28         |
| Actin overall        | Area fraction (actin area/mask area)                  | 0.41 ± 0.03        | 0.40 ± 0.03         | 0.58         |
|                      | Average process width (um)                            | 1.08 ± 0.03        | 1.08 ± 0.08         | 0.76         |
|                      |                                                       |                    |                     |              |
| Beam structure (SHG) | Area fraction (SHG area/mask area)                    | 0.46 ± 0.11        | 0.41 ± 0.07         | 0.21         |
|                      | Average beam width (um)                               | 11.62 ± 2.81       | 10.32 ± 1.90        | 0.47         |
|                      | Mean area of pores (um <sup>2</sup> )                 | 1438 ± 491         | 1321 ± 645          | 0.84         |
|                      |                                                       |                    |                     |              |
| Nuclei overall       | Median of nuclear area (um <sup>2</sup> )             | 30.41 ± 8.15       | 29.06 ± 5.53        | 0.31         |
|                      | <b>Median aspect ratio of nuclei</b>                  | <b>2.04 ± 0.20</b> | <b>1.88 ± 0.13</b>  | <b>0.017</b> |
|                      | Count*10 <sup>3</sup> /mask area (#/um <sup>2</sup> ) | 1.37 ± 0.26        | 1.42 ± 0.24         | 0.69         |
| Nuclei in pores      | Median of nuclear area (um <sup>2</sup> )             | 29.59 ± 7.51       | 27.44 ± 4.31        | 0.21         |
|                      | <b>Median aspect ratio of nuclei</b>                  | <b>1.85 ± 0.22</b> | <b>1.72 ± 0.12</b>  | <b>0.017</b> |
|                      | Count*10 <sup>3</sup> /mask area (#/um <sup>2</sup> ) | 1.10 ± 0.37        | 1.14 ± 0.43         | 0.79         |
|                      | Area percentage of nuclei in pores                    | 0.36 ± 0.14        | 0.40 ± 0.16         | 0.78         |
| Nuclei on beams      | Median of nuclear area (um <sup>2</sup> )             | 28.00 ± 7.46       | 27.37 ± 5.79        | 0.42         |
|                      | <b>Median aspect ratio of nuclei</b>                  | <b>2.16 ± 0.14</b> | <b>2.03 ± 0.130</b> | <b>0.049</b> |
|                      | Count*10 <sup>3</sup> /mask area (#/um <sup>2</sup> ) | 1.77 ± 0.40        | 1.89 ± 0.48         | 0.73         |
|                      |                                                       |                    |                     |              |
| Axon Compartments    | Number of axonal compartments                         | 4,857 ± 737        | 4,320 ± 1,153       | 0.24         |
|                      | <b>Median of axonal area (um<sup>2</sup>)</b>         | <b>0.64 ± 0.04</b> | <b>0.58 ± 0.07</b>  | <b>0.050</b> |

\*P values from multivariable linear mixed models, with significant examples marked in bold. Models

included adjustments for inclusion of 2 eyes of some persons, for inclusion of data from 3 serial sections of each eye, for central versus peripheral zones, and for age, race, and sex.
